# Supplementary material for: Authentication of Herbal Medicines Dipsacus asper and Phlomoides umbrosa Using DNA Barcodes, Chloroplast Genome, and Sequence Characterized Amplified Region (SCAR) Marker
Source: PubMed Central journal article supplement (PMC6099718; doi:10.3390/molecules23071748), 2018-07-17
Supplement: molecules-23-01748-s001.pdf [file molecules-23-01748-s001.pdf]

# Supplementary Materials: Authentication of Herbal Medicines *Dipsacus asper* and *Phlomooides umbrosa* using DNA barcode, Chloroplast Genome, and Sequence Characterized Amplified Region (SCAR) marker

Inkyu Park, Sungyu Yang, Wook Jin Kim, Pureum Noh, and Byeong Cheol Moon\*

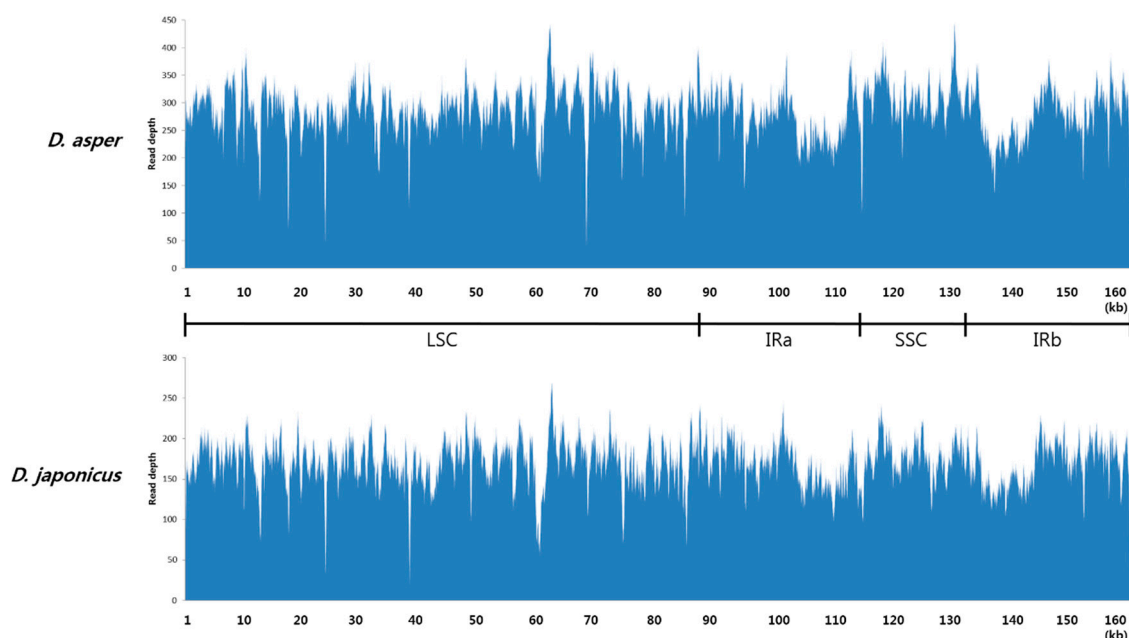

**Figure S1:** Distribution of paired-end reads mapped onto the complete chloroplast genomes of *Dipsacus asper* and *D. japonicus*.



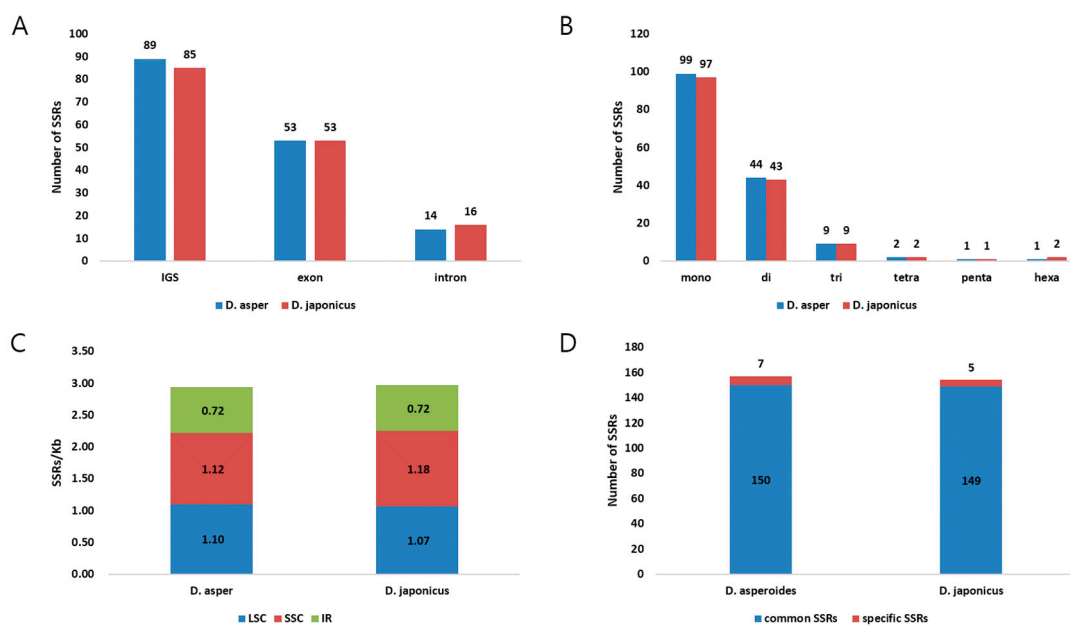

**Figure S4:** Distribution of simple sequence repeats (SSRs) in the chloroplast genomes of *D. asper* and *D. japonicus*. (A) Number of SSRs in exons, introns, and intergenic spacer (IGS) regions. (B) Number of different SSR types. (C) Number of SSRs per unit length of the chloroplast genomes. (D) Number of common and species-specific SSRs.

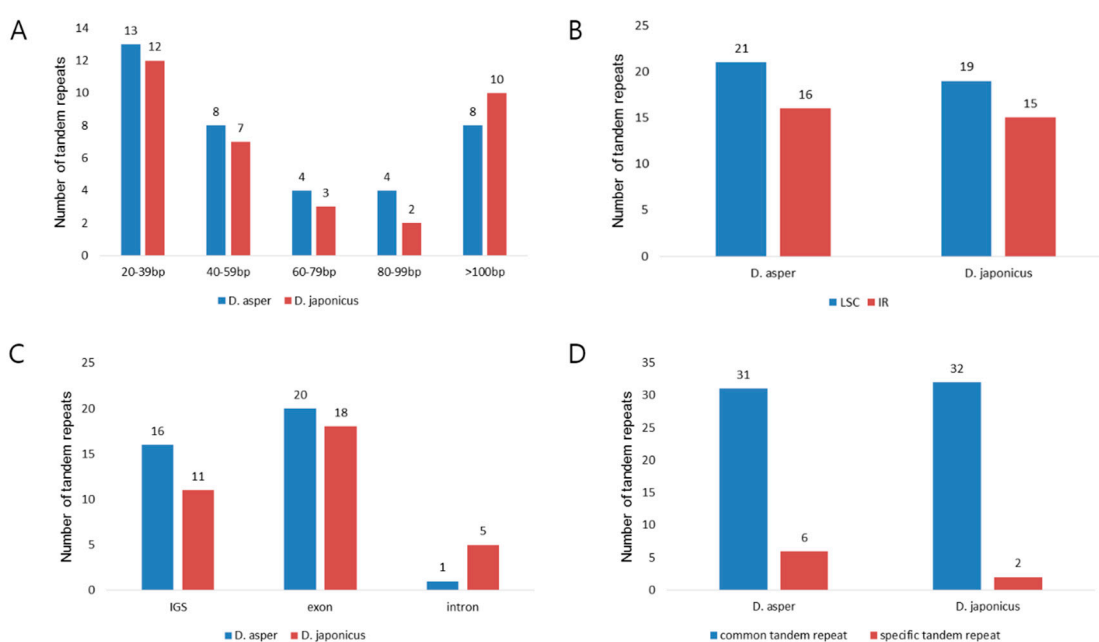

**Figure S5:** Analysis of tandem repeats in the chloroplast genomes of *D. asper* and *D. japonicus*. (A) Distribution of tandem repeats of different lengths. (B) Distribution of tandem repeats in different regions of the chloroplast genomes. (C) Number of tandem repeats in the IGS region, exons, and introns. (D) Number of common and species-specific tandem repeats.

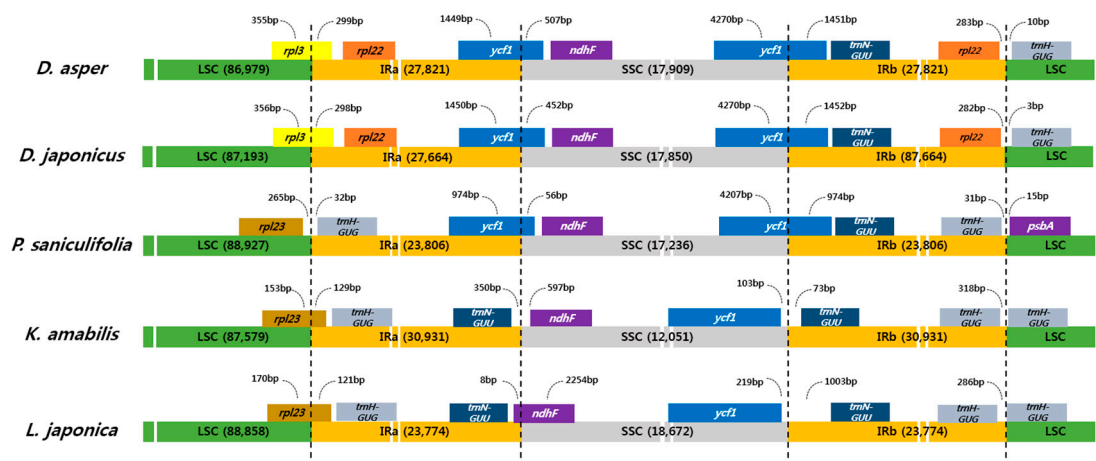

**Figure S6:** Comparison of junctions between the large single copy (LSC) region, inverted repeat (IR) regions (IRa and IRb), and small single copy (SSC) region in the chloroplast genomes of the Caprifoliaceae species, *Dipsacus asper*, *Dipsacus japonicus*, *Patrinia saniculifolia*, *Kolkwitzia amabilis*, and *Lonicera japonica*.

**Table S1:** Details of the raw sequence reads and chloroplast genome assembly of the two *Dipsacus* species.

|                              | <i>D. asper</i> | <i>D. japonicus</i> |
|------------------------------|-----------------|---------------------|
| Input reads                  | 7,293,588       | 7,379,022           |
| Trimmed reads                | 6,359,030       | 6,479,504           |
| Total raw bases (bp)         | 2,179,118,146   | 2,205,117,846       |
| Trimmed bases (bp)           | 1,577,435,941   | 1,616,928,641       |
| Aligned reads                | 189,350         | 112,697             |
| Coverage (X)                 | 286             | 170                 |
| Chloroplast genome size (bp) | 160,530         | 160,371             |

**Table S2:** List of primers used for the validation of chloroplast genomes of *D. asper* and *D. japonicus*.

| Primer name | Primer sequence (5'→3') | Product length<br>in <i>D. asper</i> |
|-------------|-------------------------|--------------------------------------|
| DIPLI_F     | GGTTGTGCAAACCAAACGGA    | 647                                  |
| DIPLI_R     | TCAAATTCGTGGGCGTTCCT    |                                      |
| DIPIS_F     | TGGCAAGAGAAATTACGCCCT   | 398                                  |
| DIPIS_R     | TGAAAAGCCCACATACGACGA   |                                      |
| DIPSI_F     | GCTAGATGCAGAGGCGCATA    | 808                                  |
| DIPSI_R     | AAGATGGCAGGCGGCTTTAT    |                                      |
| DIPIL_F     | ATCAAATTCGTGGGCGTTC     | 943                                  |
| DIPIL_R     | GCCAAGTGGATCAAGGCAGT    |                                      |

**Table S3:** PCR-based sequence validation of junctions between the large single copy (LSC), small single copy (SSC), and inverted repeat (IRa and IRb) regions in the chloroplast genomes of *D. asper* and *D. japonicus*.

| Species             | Junction | PCR product length (bp) | Chloroplast genome size (bp) | Start position | End position | Number of identical nucleotides | Percent identity |
|---------------------|----------|-------------------------|------------------------------|----------------|--------------|---------------------------------|------------------|
| <i>D. asper</i>     | LSC/IRa  | 647                     | 160,530                      | 87,507         | 87,847       | 647                             | 100              |
|                     | IRa/SSC  | 398                     |                              | 115,171        | 115,568      | 398                             | 100              |
|                     | SSC/IRb  | 808                     |                              | 133,893        | 134,700      | 808                             | 100              |
|                     | IRb/LSC  | 943                     |                              | 160,163        | 74           | 943                             | 100              |
| <i>D. japonicus</i> | LSC/IRa  | 617                     | 160,371                      | 87,414         | 88,030       | 617                             | 100              |
|                     | IRa/SSC  | 398                     |                              | 115,173        | 115,570      | 398                             | 100              |
|                     | SSC/IRb  | 808                     |                              | 133,892        | 134,696      | 808                             | 100              |
|                     | IRb/LSC  | 905                     |                              | 159,535        | 67           | 905                             | 100              |

**Table S4:** List of genes identified in the chloroplast genomes of *D. asper* and *D. japonicus* along with the encoded proteins.

| Proteins                         | Gene names                                                                                                                                                                                                                                                                                                                                                                                                   |
|----------------------------------|--------------------------------------------------------------------------------------------------------------------------------------------------------------------------------------------------------------------------------------------------------------------------------------------------------------------------------------------------------------------------------------------------------------|
| Photosystem I                    | <i>psaA, psaB, psaC, psaI, psaJ, ycf3<sup>2</sup>, ycf4</i>                                                                                                                                                                                                                                                                                                                                                  |
| Photosystem II                   | <i>psbA, psaB, psaC, psaD, psaE, psaF, psaH, psaI, psaJ, psaK, psaL, psaM, psaN, psaT, psaZ</i>                                                                                                                                                                                                                                                                                                              |
| Cytochrome <i>b6/f</i>           | <i>petA, petB<sup>1</sup>, petD<sup>1</sup>, petG, petL, petN</i>                                                                                                                                                                                                                                                                                                                                            |
| ATP synthase                     | <i>atpA, atpB, atpE, atpF<sup>1</sup>, atpH, atpI</i>                                                                                                                                                                                                                                                                                                                                                        |
| Rubisco                          | <i>rbcL</i>                                                                                                                                                                                                                                                                                                                                                                                                  |
| NADH oxidoreductase              | <i>ndhA<sup>1</sup>, ndhB<sup>1,3</sup>, ndhC, ndhD, ndhE, ndhF, ndhG, ndhH<sup>3</sup>, ndhI, ndhJ, ndhK</i>                                                                                                                                                                                                                                                                                                |
| Large subunit ribosomal proteins | <i>rpl2<sup>1,3</sup>, rpl14, rpl16<sup>1</sup>, rpl20, rpl22, rpl23<sup>3</sup>, rpl32, rpl33, rpl36</i>                                                                                                                                                                                                                                                                                                    |
| Small subunit ribosomal proteins | <i>rps2, rps3, rps4, rps7<sup>3</sup>, rps8, rps11, rps12<sup>2,3,4</sup>, rps14, rps15, rps16, rps18, rps19</i>                                                                                                                                                                                                                                                                                             |
| RNA polymerase                   | <i>rpoA, rpoB, rpoC1<sup>1</sup>, rpoC2</i>                                                                                                                                                                                                                                                                                                                                                                  |
| Unknown function                 | <i>ycf1<sup>3</sup>, ycf2<sup>3</sup></i>                                                                                                                                                                                                                                                                                                                                                                    |
| Miscellaneous                    | <i>accD, ccsA, cemA, clpP<sup>2</sup>, matK</i>                                                                                                                                                                                                                                                                                                                                                              |
| Ribosomal RNAs                   | <i>rrn16<sup>3</sup>, rrn23<sup>3</sup>, rrn4.5<sup>3</sup>, rrn5<sup>3</sup></i>                                                                                                                                                                                                                                                                                                                            |
| Transfer RNAs                    | <i>trnA-UGC<sup>1,3</sup>, trnC-GCA, trnD-GUC, trnE-UUC, trnF-GAA, trnFM-CAU, trnG-GCC, trnG-UCC<sup>1</sup>, trnH-GUG, trnI-CAU<sup>3</sup>, trnI-GAU<sup>1,3</sup>, trnK-UUU<sup>1</sup>, trnL-CAA<sup>3</sup>, trnL-UAA, trnL-UAG, trnM-CAU, trnN-GUU<sup>3</sup>, trnP-UGG, trnQ-UUG, trnR-ACG<sup>3</sup>, trnR-UCU, trnS-GCU, trnS-GGA, trnS-UGA, trnT-UGU, trnV-GAC, trnV-UAC, trnW-CCA, trnY-GUA</i> |

<sup>1</sup> Genes containing a single intron.

<sup>2</sup> Genes containing two introns.

<sup>3</sup> Genes with two copies in the IR regions.

<sup>4</sup> Trans-splicing genes.

**Table S5:** Location and sizes of genes in the chloroplast genomes of *D. asper* and *D. japonicus*.

|    | Gene            | Location | Exon I <sup>1</sup> | Intron I <sup>1</sup> | Exon II <sup>1</sup> | Intron II <sup>1</sup> | Exon III <sup>1</sup> |
|----|-----------------|----------|---------------------|-----------------------|----------------------|------------------------|-----------------------|
| 1  | <i>trnK-UUU</i> | LSC      | 37                  | 2565*                 | 35                   |                        |                       |
| 2  | <i>rps16</i>    | LSC      | 40                  | 853 (852)             | 236                  |                        |                       |
| 3  | <i>trnG-UCC</i> | LSC      | 26                  | 717 (725)             | 47                   |                        |                       |
| 4  | <i>atpF</i>     | LSC      | 144                 | 699                   | 411                  |                        |                       |
| 5  | <i>rpoC1</i>    | LSC      | 456                 | 786 (791)             | 1611                 |                        |                       |
| 6  | <i>ycf3</i>     | LSC      | 126                 | 737                   | 228                  | 753                    | 153                   |
| 7  | <i>trnL-UAA</i> | LSC      | 37                  | 513 (512)             | 50                   |                        |                       |
| 8  | <i>trnV-UAC</i> | LSC      | 39                  | 577                   | 37                   |                        |                       |
| 9  | <i>rps12</i>    | LSC      | 114                 |                       | 232                  |                        | 26                    |
| 10 | <i>clpP</i>     | LSC      | 71                  | 834 (839)             | 292                  | 679 (681)              | 231                   |
| 11 | <i>petB</i>     | LSC      | 6                   | 811                   | 642                  |                        |                       |
| 12 | <i>petD</i>     | LSC      | 8                   | 750                   | 475                  |                        |                       |
| 13 | <i>rpl16</i>    | LSC      | 9                   | 1092 (1097)           | 399                  |                        |                       |
| 14 | <i>ndhB</i>     | IR       | 777                 | 681                   | 756                  |                        |                       |
| 15 | <i>trnI-GAU</i> | IR       | 42                  | 943                   | 35                   |                        |                       |
| 16 | <i>trnA-UGC</i> | IR       | 38                  | 808                   | 35                   |                        |                       |
| 17 | <i>ndhA</i>     | SSC      | 553<br>(552)        | 1084 (1085)           | 539 (540)            |                        |                       |

<sup>1</sup> Numbers represent the gene size (bp) in *D. asper*; numbers in parentheses represent the gene size in *D. japonicus*. \* The intron length of *trnK-UUU* include *matK*.

**Table S6:** Distribution of amino acids in the chloroplast genomes of *D. asper* and *D. japonicus*.

| Amino acid | <i>D. asper</i> |                   | <i>D. japonicus</i> |                   | tRNA        |
|------------|-----------------|-------------------|---------------------|-------------------|-------------|
|            | Count           | RSCU <sup>2</sup> | Count               | RSCU <sup>1</sup> |             |
| Phe        | 877             | 1.29              | 875                 | 1.29              | trnF-GAA    |
| Phe        | 485             | 0.71              | 484                 | 0.71              | trnL-UAA    |
| Leu        | 750             | 1.78              | 748                 | 1.78              | trnL-CAA    |
| Leu        | 534             | 1.27              | 536                 | 1.27              |             |
| Leu        | 533             | 1.26              | 530                 | 1.26              |             |
| Leu        | 197             | 0.47              | 199                 | 0.47              | trnL-UAG    |
| Leu        | 360             | 0.85              | 357                 | 0.85              |             |
| Leu        | 157             | 0.37              | 154                 | 0.37              |             |
| Ile        | 929             | 1.44              | 930                 | 1.44              | trnI-GAU    |
|            |                 |                   |                     |                   | trnI-CAU    |
| Ile        | 418             | 0.65              | 415                 | 0.64              | trn(f)M-CAU |
|            |                 |                   |                     |                   | trnM-CAU    |
| Ile        | 588             | 0.91              | 589                 | 0.91              | trnM-CAU    |
| Met        | 571             | 1                 | 569                 | 1                 |             |
| Val        | 479             | 1.44              | 481                 | 1.44              | trnV-GAC    |
| Val        | 189             | 0.57              | 190                 | 0.57              | trnV-UAC    |
| Val        | 462             | 1.39              | 460                 | 1.38              |             |
| Val        | 203             | 0.61              | 204                 | 0.61              |             |
| Ser        | 515             | 1.79              | 510                 | 1.77              | trnS-GGA    |
| Ser        | 272             | 0.94              | 272                 | 0.94              | trnS-UGA    |
| Ser        | 328             | 1.14              | 327                 | 1.14              |             |
| Ser        | 156             | 0.54              | 160                 | 0.56              |             |
| Pro        | 376             | 1.45              | 377                 | 1.46              | trnS-GCU    |
| Pro        | 210             | 0.81              | 209                 | 0.81              |             |
| Pro        | 276             | 1.07              | 277                 | 1.07              |             |
| Pro        | 172             | 0.67              | 168                 | 0.65              | trnP-UGG    |
| Thr        | 519             | 1.69              | 518                 | 1.69              |             |
| Thr        | 220             | 0.72              | 218                 | 0.71              |             |
| Thr        | 344             | 1.12              | 347                 | 1.13              |             |
| Thr        | 147             | 0.48              | 146                 | 0.48              | trnT-UGU    |
| Ala        | 588             | 1.72              | 591                 | 1.73              |             |
| Ala        | 227             | 0.66              | 226                 | 0.66              |             |
| Ala        | 369             | 1.08              | 369                 | 1.08              | trnG-UCC    |
| Ala        | 183             | 0.54              | 179                 | 0.52              | trnA-UGC    |
| Tyr        | 695             | 1.61              | 693                 | 1.61              |             |
| Tyr        | 169             | 0.39              | 168                 | 0.39              |             |
| Stop       | 42              | 1.58              | 43                  | 1.61              | trnY-GUA    |



|      |     |      |     |      |          |
|------|-----|------|-----|------|----------|
| Stop | 22  | 0.83 | 22  | 0.83 |          |
| His  | 419 | 1.54 | 419 | 1.53 |          |
| His  | 125 | 0.46 | 127 | 0.47 |          |
| Gln  | 643 | 1.53 | 640 | 1.53 |          |
| Gln  | 195 | 0.47 | 197 | 0.47 | trnH-GUG |
| Asn  | 776 | 1.54 | 778 | 1.54 | trnQ-UUG |
| Asn  | 235 | 0.46 | 235 | 0.46 |          |
| Lys  | 925 | 1.42 | 923 | 1.41 |          |
| Lys  | 380 | 0.58 | 388 | 0.59 | trnN-GUU |
| Asp  | 759 | 1.57 | 760 | 1.57 | trnK-UUU |
| Asp  | 210 | 0.43 | 211 | 0.43 |          |
| Glu  | 927 | 1.39 | 931 | 1.39 |          |
| Glu  | 411 | 0.61 | 405 | 0.61 | trnD-GUC |
| Cys  | 188 | 1.43 | 188 | 1.44 | trnE-UUC |
| Cys  | 75  | 0.57 | 74  | 0.56 |          |
| Stop | 16  | 0.6  | 15  | 0.56 |          |
| Trp  | 414 | 1    | 414 | 1    | trnC-GCA |
| Arg  | 310 | 1.27 | 311 | 1.27 | trnW-CCA |
| Arg  | 104 | 0.42 | 101 | 0.41 | trnR-ACG |
| Arg  | 338 | 1.38 | 337 | 1.38 |          |
| Arg  | 104 | 0.42 | 104 | 0.43 |          |
| Ser  | 342 | 1.19 | 343 | 1.19 |          |
| Ser  | 115 | 0.4  | 116 | 0.4  | trnR-UCU |
| Arg  | 447 | 1.82 | 447 | 1.83 |          |
| Arg  | 167 | 0.68 | 167 | 0.68 |          |
| Gly  | 525 | 1.27 | 526 | 1.27 | trnG-GCC |
| Gly  | 192 | 0.46 | 192 | 0.46 | trnG-UCC |
| Gly  | 605 | 1.46 | 605 | 1.46 |          |
| Gly  | 333 | 0.8  | 331 | 0.8  |          |

---

<sup>1</sup> RSCU, Relative synonymous codon usage.

**Table S7:** Details of polymorphic simple sequence repeats (SSRs) in the chloroplast genomes of *D. asper* and *D. japonicus*.

| No. | Location <sup>1</sup>                        | Region <sup>2</sup> | Motif | Repeat number   |                     |
|-----|----------------------------------------------|---------------------|-------|-----------------|---------------------|
|     |                                              |                     |       | <i>D. asper</i> | <i>D. japonicus</i> |
| 1   | IGS ( <i>rps16</i> , <i>trnQ-UUG</i> )       | LSC                 | A     | 10              | 9                   |
| 2   | IGS ( <i>rps16</i> , <i>trnQ-UUG</i> )       | LSC                 | T     | 13              | 11                  |
| 3   | IGS ( <i>psbK</i> , <i>psbI</i> )            | LSC                 | T     | 11              | 10                  |
| 4   | IGS ( <i>trnS-GCU</i> , <i>trnG-UCC</i> )    | LSC                 | A     | 10              | 9                   |
| 5   | Intron ( <i>atpA</i> , <i>atpF</i> )         | LSC                 | A     | 20              | 16                  |
| 6   | Intron ( <i>atpF</i> , <i>atpF</i> )         | LSC                 | T     | 10              | 11                  |
| 7   | IGS ( <i>trnT-UGU</i> , <i>trnL-UAA</i> )    | LSC                 | T     | 11              | 10                  |
| 8   | IGS ( <i>trnT-UGU</i> , <i>trnL-UAA</i> )    | LSC                 | A     | 10              | 12                  |
| 9   | IGS ( <i>trnL-UAA</i> , <i>trnL-UAA</i> )    | LSC                 | A     | 9               | 8                   |
| 10  | IGS ( <i>trnF-GAA</i> , <i>ndhJ</i> )        | LSC                 | A     | 9               | 8                   |
| 11  | IGS ( <i>trnF-GAA</i> , <i>ndhJ</i> )        | LSC                 | T     | 11              | 10                  |
| 12  | Intron ( <i>trnV-UAC</i> , <i>trnV-UAC</i> ) | LSC                 | T     | 10              | 9                   |
| 13  | Intron ( <i>rbcL</i> , <i>accD</i> )         | LSC                 | A     | 8               | 9                   |
| 14  | IGS ( <i>rbcL</i> , <i>accD</i> )            | LSC                 | T     | 8               | 10                  |
| 15  | IGS ( <i>psbE</i> , <i>petL</i> )            | LSC                 | T     | 20              | 14                  |
| 16  | IGS ( <i>psbE</i> , <i>petL</i> )            | LSC                 | T     | 11              | 9                   |
| 17  | IGS ( <i>clpP</i> , <i>clpP</i> )            | LSC                 | T     | 9               | 12                  |
| 18  | IGS ( <i>clpP</i> , <i>clpP</i> )            | LSC                 | T     | 12              | 10                  |
| 19  | IGS ( <i>clpP</i> , <i>clpP</i> )            | LSC                 | A     | 9               | 10                  |
| 20  | IGS ( <i>clpP</i> , <i>clpP</i> )            | LSC                 | T     | 11              | 10                  |
| 21  | IGS ( <i>clpP</i> , <i>psbB</i> )            | LSC                 | A     | 9               | 10                  |
| 22  | IGS ( <i>petD</i> , <i>rpoA</i> )            | LSC                 | T     | 11              | 10                  |
| 23  | IGS ( <i>rps8</i> , <i>rpl14</i> )           | LSC                 | T     | 9               | 11                  |
| 24  | IGS ( <i>rpl14</i> , <i>rpl16</i> )          | LSC                 | A     | 14              | 13                  |
| 25  | IGS ( <i>rpl14</i> , <i>rpl16</i> )          | LSC                 | T     | 10              | 9                   |
| 26  | IGS ( <i>ccsA</i> , <i>ndhD</i> )            | SSC                 | T     | 12              | 10                  |
| 27  | Intron ( <i>ndhD</i> , <i>psaC</i> )         | SSC                 | A     | 11              | 9                   |

<sup>1</sup> IGS, intergenic spacer.<sup>2</sup> LSC, large single copy region; SSC, small single copy region.

**Table S8:** Details of palindromic repeats in the chloroplast genomes of *D. asper* and *D. japonicus*.

| Species             | Position                      | Loop<br>(bp) | Position                          | Repeat unit<br>length (bp) | Repeat sequence                       | Region |
|---------------------|-------------------------------|--------------|-----------------------------------|----------------------------|---------------------------------------|--------|
| <i>D. asper</i>     | IGS ( <i>trnH-GUG, psbA</i> ) | 6            | IGS ( <i>trnH-GUG, psbA</i> )     | 33                         | TTAAATAAAAAGGGAGCAATAATCCCCCTCTT<br>G | LSC    |
| <i>D. japonicus</i> | IGS ( <i>psbM, trnD-GUC</i> ) | 64           | IGS ( <i>trnE-UUC, trnT-GGU</i> ) | 25                         | TATTTGGGTTTGGGGTTCGTTCTTT             | LSC    |
|                     | Intron ( <i>petD, petD</i> )  | 2            | Intron ( <i>trnT-GGU, psbD</i> )  | 25                         | TAAGTGAAGTAGATAACCCAGAATC             | LSC    |

**Table S9:** List of primers used for the amplification of SCAR markers.

| Primer name | Primer sequence (5'→3')  | Product size                  | Position    |
|-------------|--------------------------|-------------------------------|-------------|
| DAJ-AC_F    | GCTAAGTTCTATTGAGGAGGCTCC | 185 bp in <i>D. asper</i> and | <i>accD</i> |
| DAJ-AC_R    | CGACATCCTCATCCTCCTCATCGA | 329 bp in <i>D. japonicus</i> |             |
| PU-M_F      | GGATTTGGGGGCAAACCTGC     | 256 bp in <i>P. umbrosa</i>   | <i>matK</i> |
| PU-M_R      | GCGTACTACAGAAGGGTTCCTT   |                               |             |

Table S10: Details of germplasm used in this study.

| No | Species             | Information collected                                                | Voucher number   | DNA barcode analysis | SCAR marker test | Completed chloroplast genome |
|----|---------------------|----------------------------------------------------------------------|------------------|----------------------|------------------|------------------------------|
| 1  |                     | Goejeong-ri, Cheongju-si, Chungcheongbuk-do, Korea                   | KIOM201701018837 | o                    | o                | o                            |
| 2  |                     | Agricultural Seedling Station, Aewol-eup, Jeju-si, Jeju-do, Korea    | KIOM201201004803 | o                    | o                |                              |
| 3  | <i>D. asper</i>     | Agricultural Seedling Station, Aewol-eup, Jeju-si, Jeju-do, Korea    | KIOM201201004804 | o                    | o                |                              |
| 4  |                     | Songming, Yunnan, China                                              | KIOM201501011655 | o                    | o                |                              |
| 5  |                     | Hezhang, Bijie, Guiyang, Guizhou, China                              | KIOM201101004457 | o                    | o                |                              |
| 6  |                     | Samsoo-dong, Taebaek-si, Gangwon-do, Korea                           | KIOM-2016-277    | o                    | o                | o                            |
| 7  | <i>D. japonicus</i> | Sabuk-ri, Sabuk-eup, Jeongseon-gun, Gangwon-do, Korea                | KIOM-2016-269    | o                    | o                |                              |
| 8  |                     | Yeongchun-myeon, Danyang-gun, Chungcheongbuk-do, Korea               | KIOM201701018775 | o                    | o                |                              |
| 9  |                     | Jeopsan Mt., Geoun-ri, Yeongwol-eup, Yeongwol-gun, Gangwon-do, Korea | KIOM201501014658 | o                    | o                |                              |
| 10 | <i>P. umbrosa</i>   | Wangdusan Mt., Chunyang-myeon, Bonghwa-gun, Gyeongsangbuk-do, Korea  | KIOM201401010793 | o                    | o                |                              |
| 11 |                     | Seolcheon-myeon, Muju-gun, Jeollabuk-do, Korea                       | KIOM201501012395 | o                    | o                |                              |
| 12 |                     | Seorak-myeon, Gapyeong-gun, Gyeonggi-do, Korea                       | KIOM201301005989 | o                    | o                |                              |

**Table S11:** List of chloroplast genomes downloaded from NCBI for phylogenetic analysis.

| No. | Taxon                             | Order      | Family         | GenBank accession number |
|-----|-----------------------------------|------------|----------------|--------------------------|
| 1   | <i>Kolkwitzia amabilis</i>        |            |                | KT966716.1               |
| 2   | <i>Lonicera japonica</i>          |            | Caprifoliaceae | KJ170923.1               |
| 3   | <i>Patrinia saniculifolia</i>     |            |                | MG517444.1               |
| 4   | <i>Tetradoxa omeiensis</i>        | Dipsacales |                | KX258653.1               |
| 5   | <i>Viburnum utile</i>             |            |                | KX792264.1               |
| 6   | <i>Adoxa moschatellina</i>        |            | Adoxaceae      | KX258652.1               |
| 7   | <i>Sambucus williamsii</i>        |            |                | KX510276.1               |
| 8   | <i>Sinadoxa corydalifolia</i>     |            |                | KX258651.1               |
| 9   | <i>Eleutherococcus senticosus</i> |            |                | JN637765.1               |
| 10  | <i>Fatsia japonica</i>            |            |                | KR021045.1               |
| 11  | <i>Kalopanax septemlobus</i>      |            |                | KC456167.1               |
| 12  | <i>Metapanax delavayi</i>         | Apiales    | Araliaceae     | KC456165.1               |
| 13  | <i>Panax ginseng</i>              |            |                | AY582139.1               |
| 14  | <i>Panax notoginseng</i>          |            |                | KJ566590.1               |
| 15  | <i>Schefflera delavayi</i>        |            |                | KC456166.1               |
| 16  | <i>Aralia undulata</i>            |            |                | KC456163.1               |
